# Supplementary material for: Next-Generation Counseling: Noninvasive Prenatal Screening Results Disclosure and Management
Source: Preprints.org preprint supplement (doi:10.20944/preprints201806.0284.v1), 2018-06-19
Supplement: Supplementary file 1 [file supplementary]

## Next-generation counseling: noninvasive prenatal screening results disclosure and management

### Supplementary Material

Aishwarya ARJUNAN, MS, MPH, CGC<sup>1</sup>; Rotem BEN-SHACHAR, PhD<sup>1</sup>; Jamie KOSTIALIK, MS, CGC<sup>1</sup>; Katherine JOHANSEN TABER, PhD<sup>1</sup>; Gabriel A. LAZARIN, MS, CGC<sup>1</sup>; Elizabeth DENNE, MS, CGC<sup>1</sup>; Dale MUZZEY, PhD<sup>1</sup>; Carrie HAVERTY, MS, CGC<sup>1</sup>

<sup>1</sup>Counsyl, 180 Kimball Way, South San Francisco, CA 94080, USA

Conflict of Interest/Disclosure: All authors are employees of Counsyl.

### Supplementary Table I. Patient Ethnicities of Diverse Patient Cohort

| <b>Ethnicity</b>         | <b>Tested</b> | <b>% (95% CI)</b> |
|--------------------------|---------------|-------------------|
| African/African-American | 4,461         | 6.7 (6.4, 7.0)    |
| Ashkenazi Jewish         | 852           | 1.3 (1.1, 1.4)    |
| East Asian               | 2,290         | 3.4 (3.2, 3.7)    |
| French Canadian/Cajun    | 118           | 0.18 (0.1, 0.2)   |
| Finnish                  | 11            | 0.02 (.007, .04)  |
| Hispanic                 | 6,606         | 10.0 (9.6, 10.3)  |
| Middle Eastern           | 803           | 1.2 (1.1, 1.3)    |
| Mixed/Other Caucasian    | 23,046        | 34.7 (34.7, 35.2) |
| Native American          | 225           | 0.3 (0.3, 0.4)    |
| Northern European        | 7,213         | 10.9 (10.5, 11.2) |
| Pacific Islander         | 166           | 0.2 (0.2, 0.3)    |
| South Asian              | 1,986         | 3.0 (2.8, 3.2)    |
| Southeast Asian          | 1,412         | 2.1 (2.0, 2.2)    |
| Southern European        | 938           | 1.4 (1.3, 1.6)    |
| Unknown/Not reported     | 16,348        | 24.6 (24.1, 25.1) |

### Supplementary Table II: Screen Positive Results

| <b>Condition Screened</b> | <b>Screen Positive Results</b> |
|---------------------------|--------------------------------|
| Trisomy 13*               | 110                            |
| Trisomy 18*               | 176                            |
| Trisomy 21*               | 458                            |
| Monosomy 13               | 22                             |
| Monosomy 18*              | 12                             |
| Monosomy 21               | 9                              |
| Monosomy X                | 253                            |
| XXX                       | 56                             |
| XXY                       | 53                             |
| XYY                       | 28                             |
| del1p36                   | 7                              |
| del5p                     | 8                              |
| del4p                     | 6                              |
| del15q11.2                | 12                             |
| del22q                    | 8                              |
| Total                     | 1,218 <sup>†</sup>             |

\*Includes both aneuploidy suspected and aneuploidy detected results

<sup>†</sup> Some tests were positive for multiple conditions: 1180 tests were positive for one condition, 16 tests were positive for two conditions and 2 tests were positive for three conditions.

**Supplementary Table III: Factors affecting genetic counseling election**

|                                                          | <b>Positive Test Results Delivered by Provider</b> | <b>Positive Test Result Delivered by Provider and Elected Genetic Counseling</b> | <b>Negative Test Results</b> | <b>Negative Test Result and Elected Genetic Counseling</b> |
|----------------------------------------------------------|----------------------------------------------------|----------------------------------------------------------------------------------|------------------------------|------------------------------------------------------------|
| AMA, first pregnancy                                     | 137                                                | 19 (13.8%)                                                                       | 7,427                        | 746 (10.0%)                                                |
| AMA, not first pregnancy                                 | 517                                                | 75 (14.5%)                                                                       | 21,562                       | 1,765 (8.2%)                                               |
| Abnormal U/S, central nervous system                     | 33                                                 | 3 (9.1%)                                                                         | 504                          | 36 (7.1%)                                                  |
| Abnormal U/S, other                                      | 113                                                | 14 (12.4%)                                                                       | 2,180                        | 144 (6.6%)                                                 |
| Chromosome abnormality suspected in fetus                | 57                                                 | 8 (14.0%)                                                                        | 785                          | 68 (8.6%)                                                  |
| Other high-risk pregnancy                                | 55                                                 | 11 (22.0%)                                                                       | 3,027                        | 262 (8.7%)                                                 |
| Family history                                           | 10                                                 | 1 (10.0%)                                                                        | 860                          | 89 (10.3%)                                                 |
| History of chromosomal abnormality in previous pregnancy | 11                                                 | 3 (27.3%)                                                                        | 831                          | 86 (10.3%)                                                 |
| Abnormal maternal serum screen                           | 48                                                 | 8 (16.7%)                                                                        | 1,413                        | 100 (7.1%)                                                 |
| Twin pregnancy                                           | 15                                                 | 1 (6.7%)                                                                         | 1,388                        | 134 (9.7%)                                                 |
| Tried IVF                                                | 58                                                 | 11 (19.0%)                                                                       | 3,240                        | 243 (7.5%)                                                 |
| Provider delivered results                               | 1,166                                              | 194 (16.6%)                                                                      | 2,172                        | 40 (1.8%)                                                  |
| Positive test results                                    | 1,166                                              | 194 (16.6%)                                                                      | 0                            | 0 (0%)                                                     |

AMA: Advanced Maternal Age

U/S: Ultrasound

IVF: In-vitro fertilization
